# Supplementary material for: One-Step Oxidation of Orange Peel Waste to Carbon Feedstock for Bacterial Production of Polyhydroxybutyrate
Source: MDPI journal article supplement (doi:10.3390/polym15030697), 2023-01-30
Supplement: s1 [file s1]

# One-Step Oxidation of Orange Peel Waste to Carbon Feedstock for Bacterial Production of Polyhydroxy-butyrate

Maryam Davaritouchae<sup>1</sup>, Imann Mosleh<sup>1</sup>, Younas Dadmohammadi<sup>1</sup>, Alireza Abbaspourrad<sup>1\*</sup>

<sup>1</sup>Department of Food Science, College of Agriculture & Life Sciences, Cornell University, Stocking Hall, Ithaca, New York, 14853, United States

\*Corresponding Author, Email address: Alireza@cornell.edu

*Table S1: ANOVA study of effect of each variables (carbon source and time) on response (CDW and PHB content), and the interactions of variables*

Response Cell Dry Weigh

| Source                 | Nparm | DF | Sum of Squares | F Ratio | Prob > F |
|------------------------|-------|----|----------------|---------|----------|
| Carbon Source          | 5     | 5  | 23.263927      | 84.3833 | <.0001*  |
| Time (h)               | 3     | 3  | 5.116962       | 30.9339 | <.0001*  |
| Carbon Source*Time (h) | 15    | 15 | 3.279592       | 3.9653  | 0.0002*  |

Response PHB Content

| Source                 | Nparm | DF | Sum of Squares | F Ratio  | Prob > F |
|------------------------|-------|----|----------------|----------|----------|
| Carbon Source          | 5     | 5  | 1081918.1      | 193.4373 | <.0001*  |
| Time (h)               | 3     | 3  | 384803.7       | 114.6658 | <.0001*  |
| Carbon Source*Time (h) | 15    | 15 | 485103.7       | 28.9107  | <.0001*  |

Table S2: the yields of fermentable sugar monomer and inhibitory compounds after 1, 2, and 3 h of oxidation in each treatment run

|     |                   | Control | 0.02-OX-OP | 0.05-OX-OP | 0.25-OX-OP | 0.5-OX-OP | 1-OX-OP |
|-----|-------------------|---------|------------|------------|------------|-----------|---------|
| 1 h | Glucose           | 31.31   | 48.62      | 55.94      | 36.97      | 15.94     | 17.55   |
|     | Galactose         | NA      | 1.90       | 3.12       | 1.69       | 0.99      | 1.68    |
|     | Xylose            | NA      | 2.48       | 2.70       | 1.36       | 0.93      | 1.51    |
|     | Fructose          | 8.58    | 22.34      | 24.84      | 13.66      | 11.27     | 11.26   |
|     | Acetic Acid       | 0.08    | 0.56       | 0.52       | 0.44       | 1.40      | 1.01    |
|     | HMF               | NA      | -1.74      | -1.54      | -1.25      | -1.05     | -1.62   |
|     | Furfural          | NA      | 0.12       | NA         | NA         | NA        | 0.15    |
|     | Galacturonic acid | 45.83   | 26.48      | 22.29      | 19.20      | 18.25     | 9.11    |
| 2 h | Glucose           | 30.63   | 47.55      | 32.42      | 24.58      | 10.01     | 9.34    |
|     | Galactose         | NA      | NA         | NA         | NA         | 1.11      | 2.21    |
|     | Xylose            | NA      | NA         | NA         | NA         | 0.91      | 1.64    |
|     | Fructose          | 6.19    | 16.37      | 10.86      | 11.79      | 5.80      | 10.07   |
|     | Acetic Acid       | #DIV/0! | 0.44       | 0.62       | 0.84       | 0.51      | 0.57    |
|     | HMF               | #DIV/0! | -1.70      | -1.50      | -1.33      | -1.36     | -1.59   |
|     | Furfural          | #DIV/0! | 0.17       | 0.15       | 0.12       | 0.11      | 0.10    |
|     | Galacturonic acid | 47.54   | 22.74      | 13.08      | 13.12      | 13.03     | 6.27    |
| 3 h | Glucose           | 31.52   | 44.01      | 30.66      | 20.97      | 5.71      | 9.34    |
|     | Galactose         | NA      | NA         | NA         | NA         | 0.98      | 2.77    |
|     | Xylose            | NA      | NA         | NA         | NA         | 0.98      | 2.77    |
|     | Fructose          | 6.42    | 14.95      | 9.71       | 11.78      | 5.60      | 8.41    |
|     | Acetic Acid       | NA      | NA         | 0.38       | 0.61       | 1.62      | 1.29    |
|     | HMF               | NA      | NA         | -1.77      | -1.43      | -1.49     | -1.94   |
|     | Furfural          | NA      | 0.19       | 0.08       | 0.08       | NA        | 0.12    |
|     | Galacturonic acid | 46.34   | NA         | NA         | NA         | NA        | -1.87   |

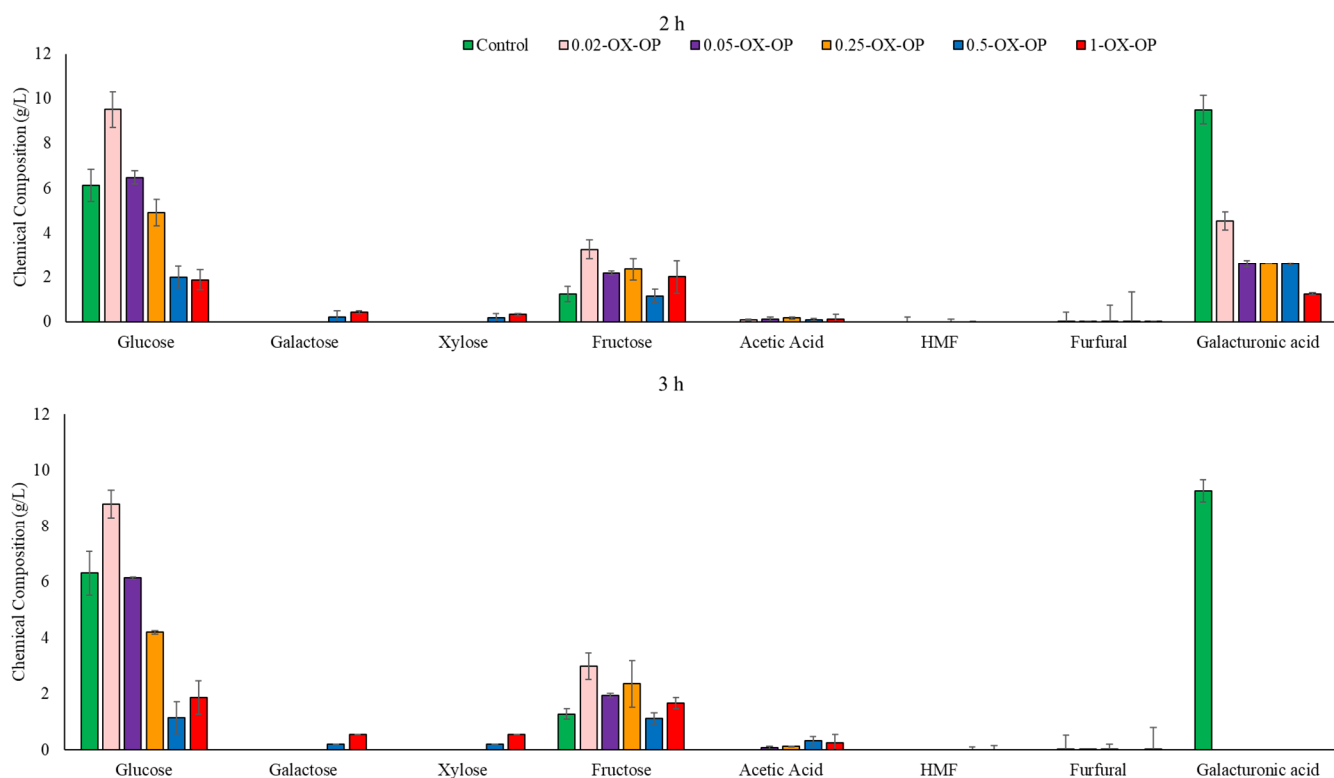

*Figure S1: Sugar content in control and pretreated samples for 2 and 3 h of oxidation reaction by different concentration of oxidative agents; control (alkaline aqueous solution without exogenous addition of  $KO_2$ ), 0.05-OX-OP (orange peels oxidized by 0.05 M  $KO_2$ ), 0.25-OX-OP (orange peels oxidized by 0.25 M  $KO_2$ ), 0.5-OX-OP (orange peels oxidized by 0.5 M  $KO_2$ ), 1-OX-OP (orange peels oxidized by 1 M  $KO_2$ )*

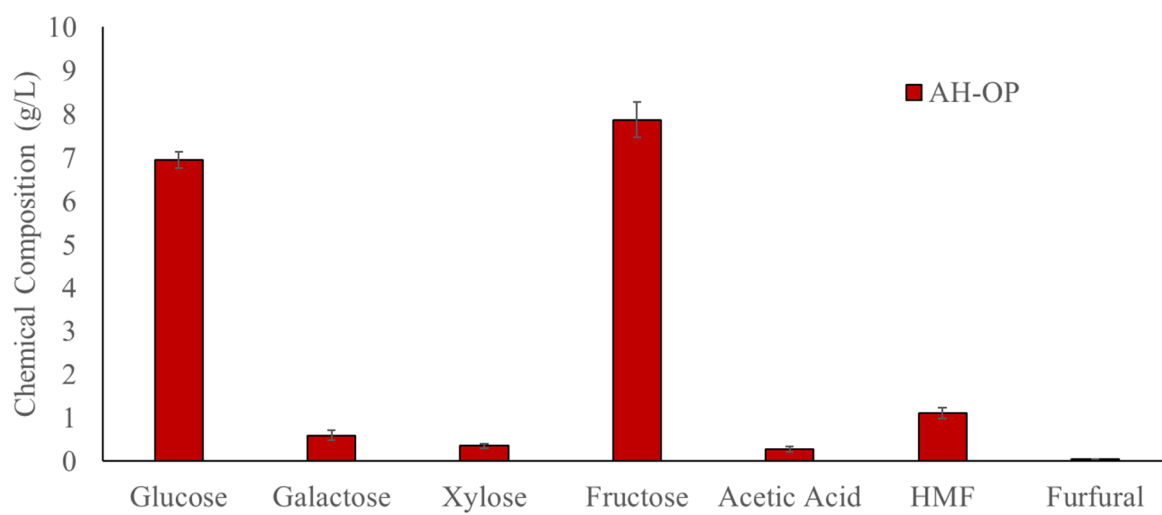

*Figure S2: Sugars content of acid hydrolyzed orange peel, 15.77 gr/L released sugar content.*

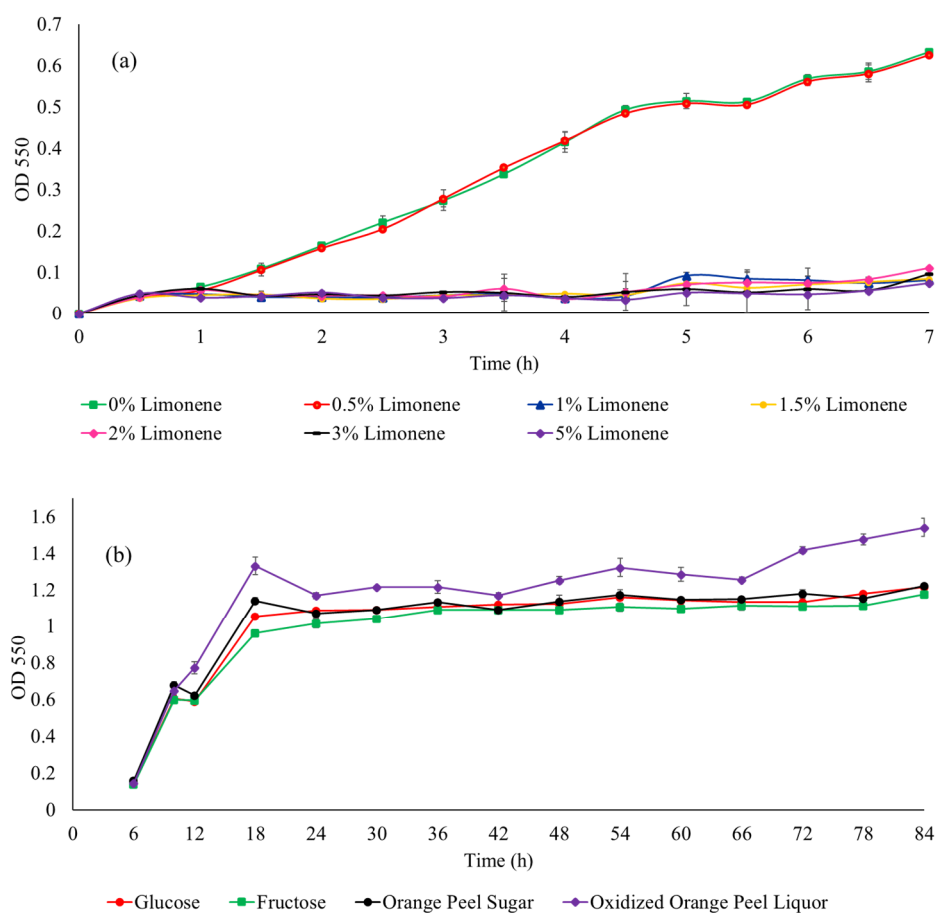

Figure S3: Growth rate of JM109 *E. coli* in the presence of (a) 0-5% v/v limonene. (b) Bacteria growth comparison when fed with glucose, fructose, simulated orange peel sugar, and oxidized orange peel sugar during 3 days of fermentation.

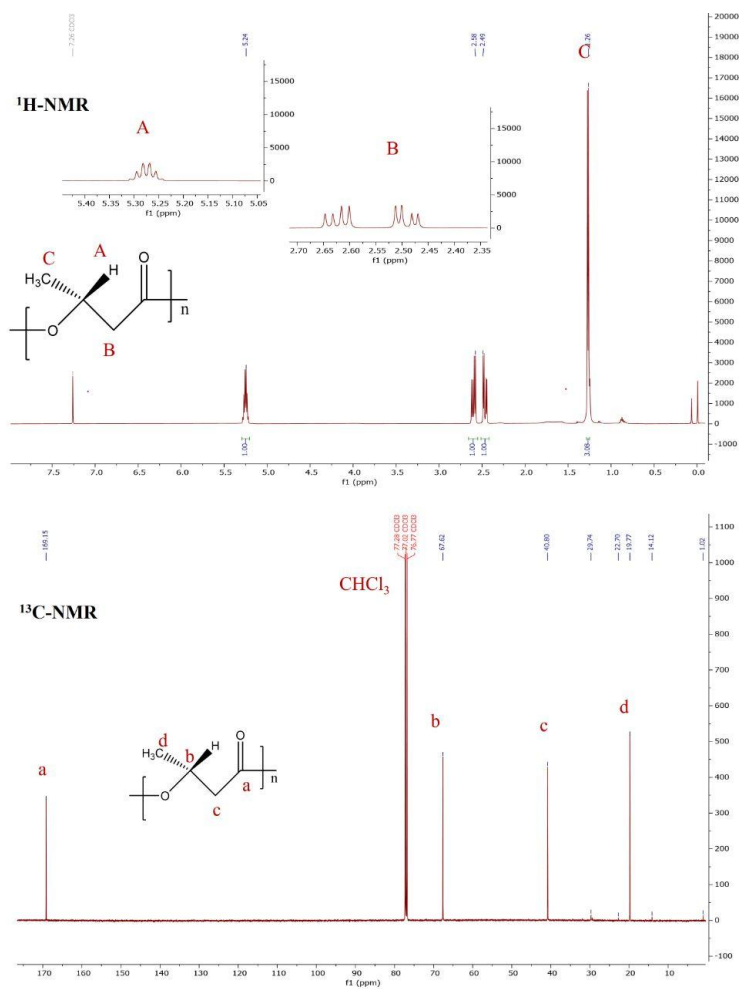

Figure S4: <sup>1</sup>H-NMR (up) and <sup>13</sup>C-NMR (down) spectra in CDCl<sub>3</sub> of PHB derived from cells fed with oxidized orange peels after 72 h.

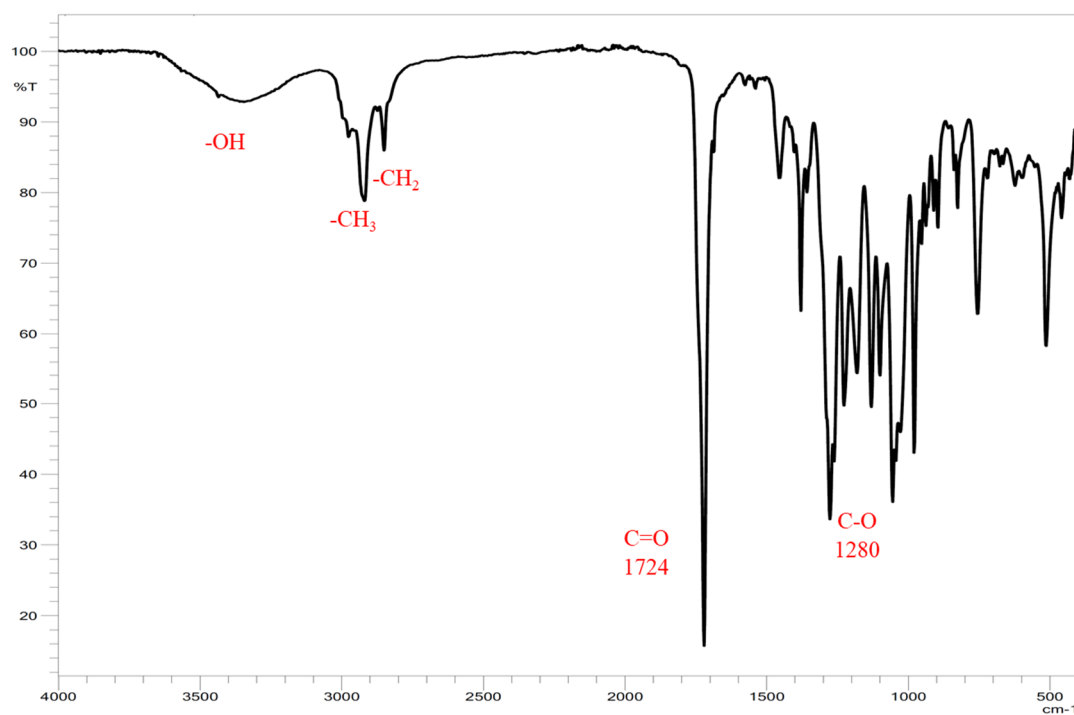

*Figure S5: FT-IR spectrum of PHB derived from cells fed with oxidized orange peels after 72 h incubation.*

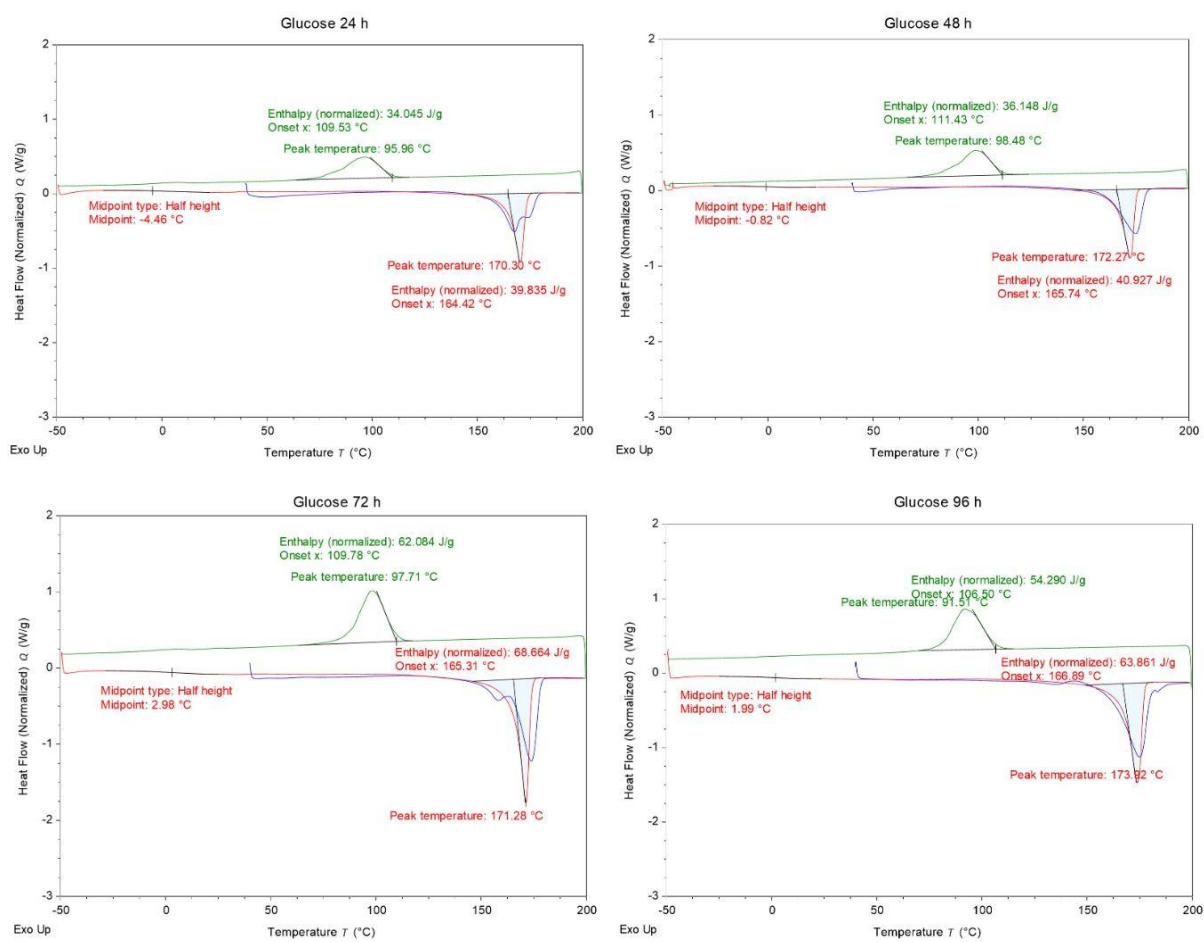

Figure S6: DSC thermograms of produced PHB using glucose as carbon source at designated time frames. Blue curve: the first heating step, green curve: is the cooling step, and red curve: the second heating step.

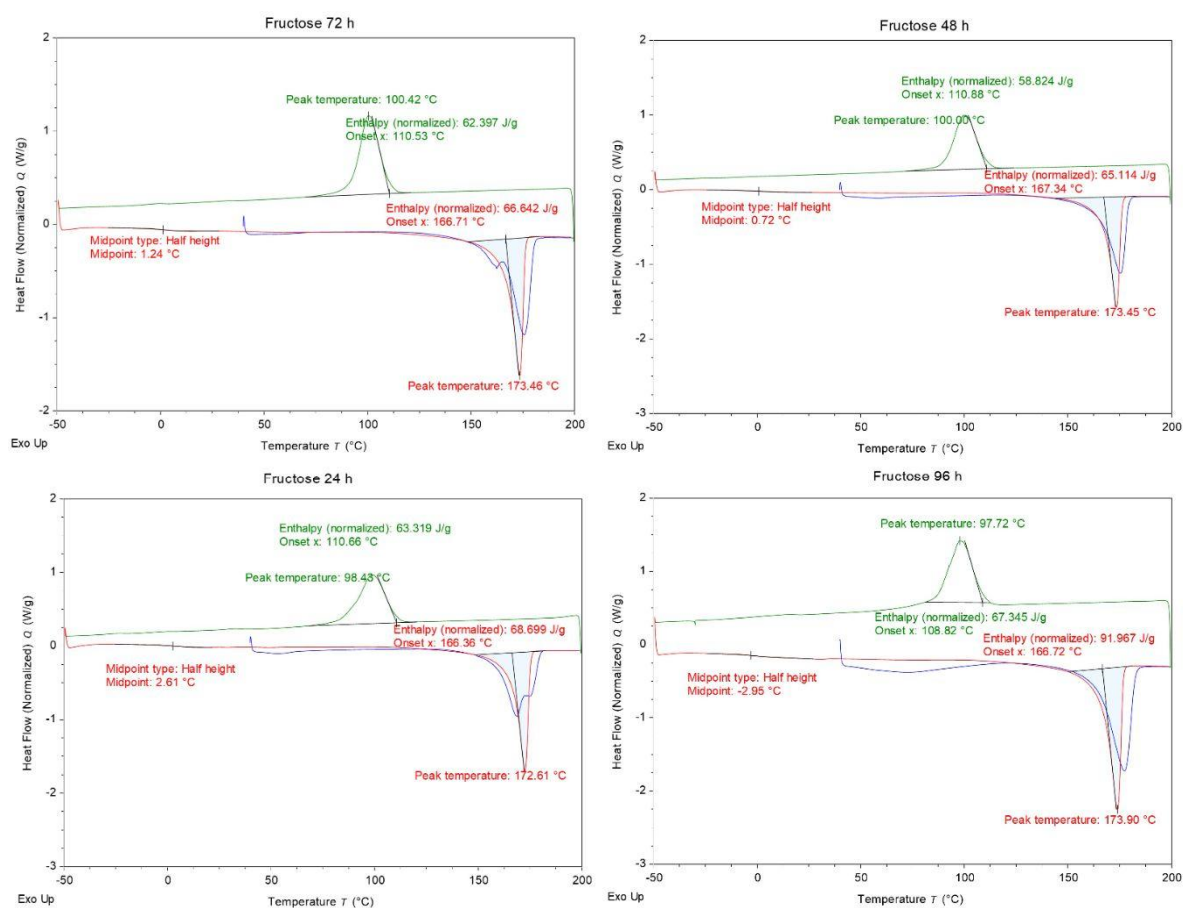

Figure S7: DSC thermograms of produced PHB using fructose as carbon source at designated time frames. Blue curve: the first heating step, green curve: is the cooling step, and red curve: the second heating step.

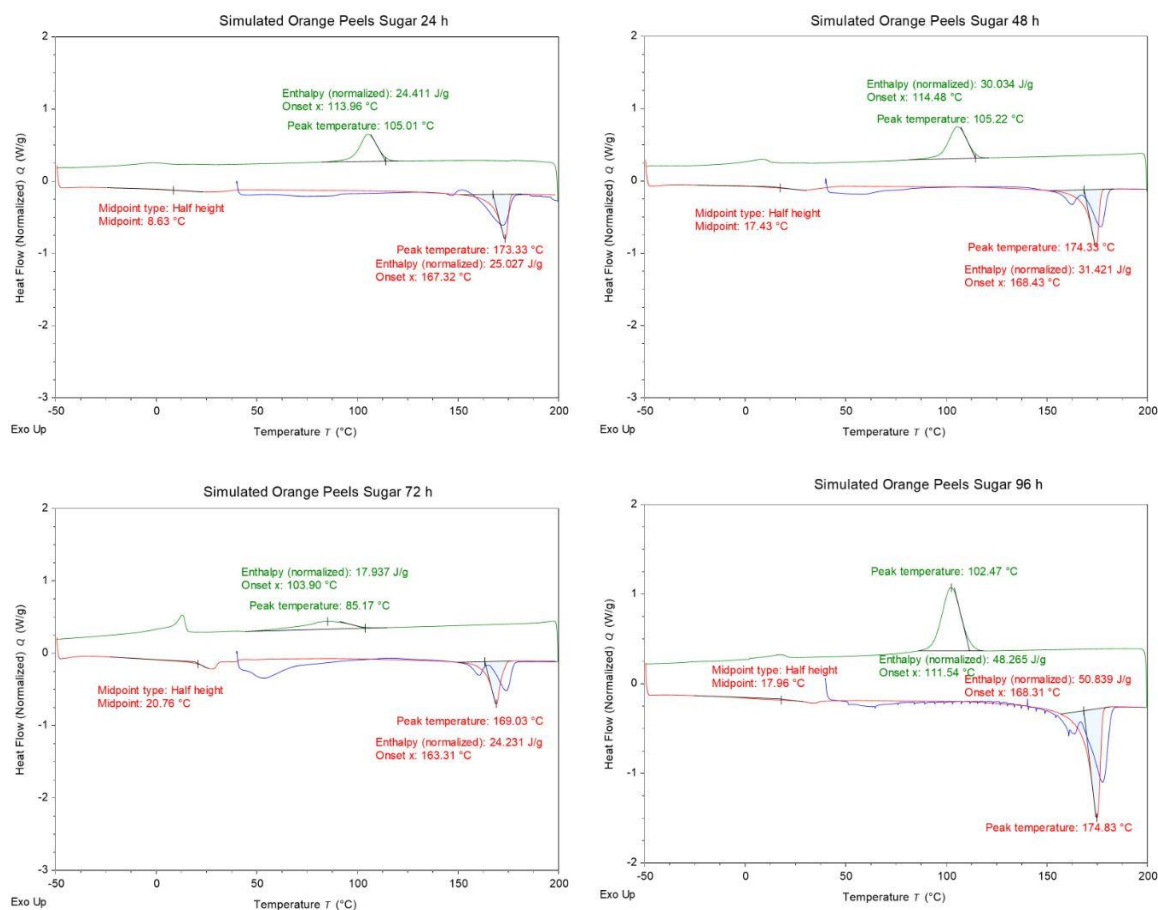

Figure S8: DSC thermograms of produced PHB using simulated orange sugar peels as carbon source at designated time frames. Blue curve: the first heating step, green curve: is the cooling step, and red curve: the second heating step.

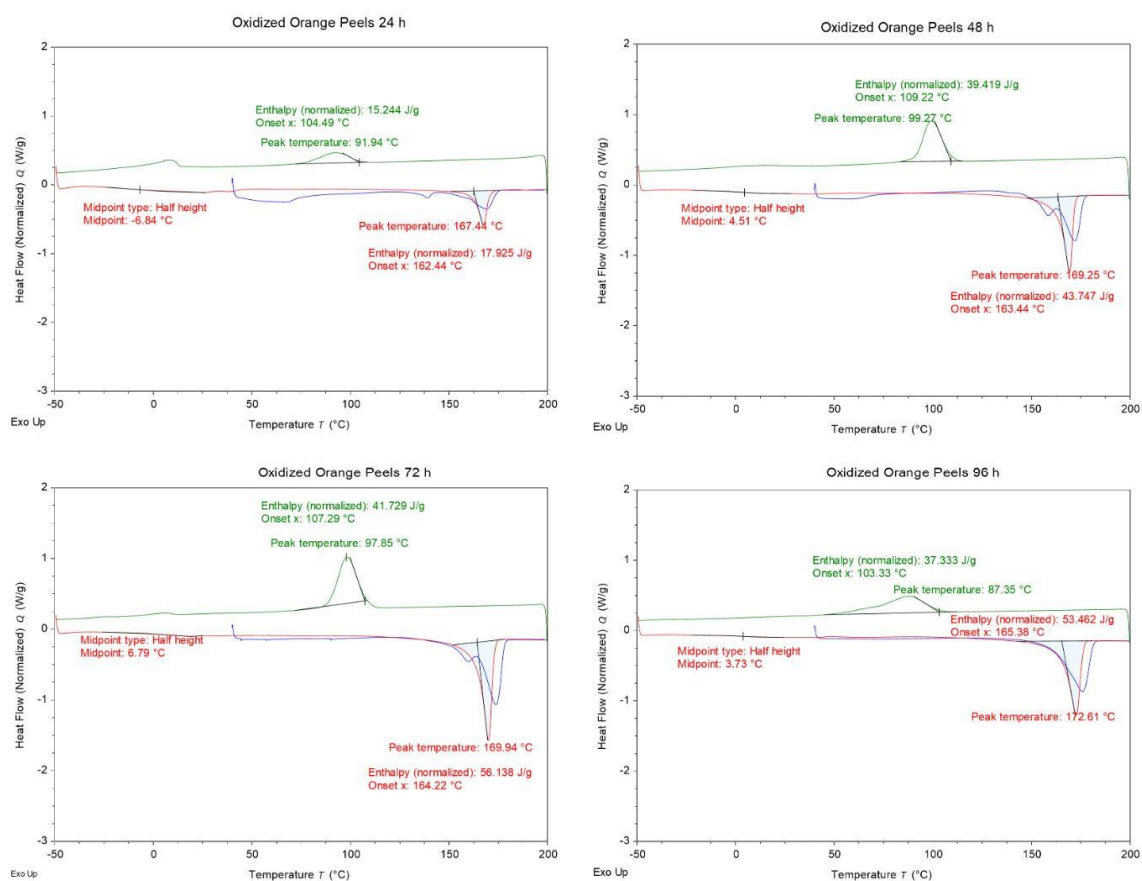

Figure S9: DSC thermograms of produced PHB using oxidized orange peels as carbon source at designated time frames. Blue curve: the first heating step, green curve: is the cooling step, and red curve: the second heating step.
